# Supplementary material for: Persistent hepatitis C virus infections and hepatopathological manifestations in immune-competent humanized mice
Source: PubMed Central journal article supplement — Cell Res. 2014 Aug 26;24(9):1050–66. doi: 10.1038/cr.2014.116 (PMC4152738; doi:10.1038/cr.2014.116), 2014-08-26
Supplement: cr2014116x1.pdf [file cr2014116x1.pdf]

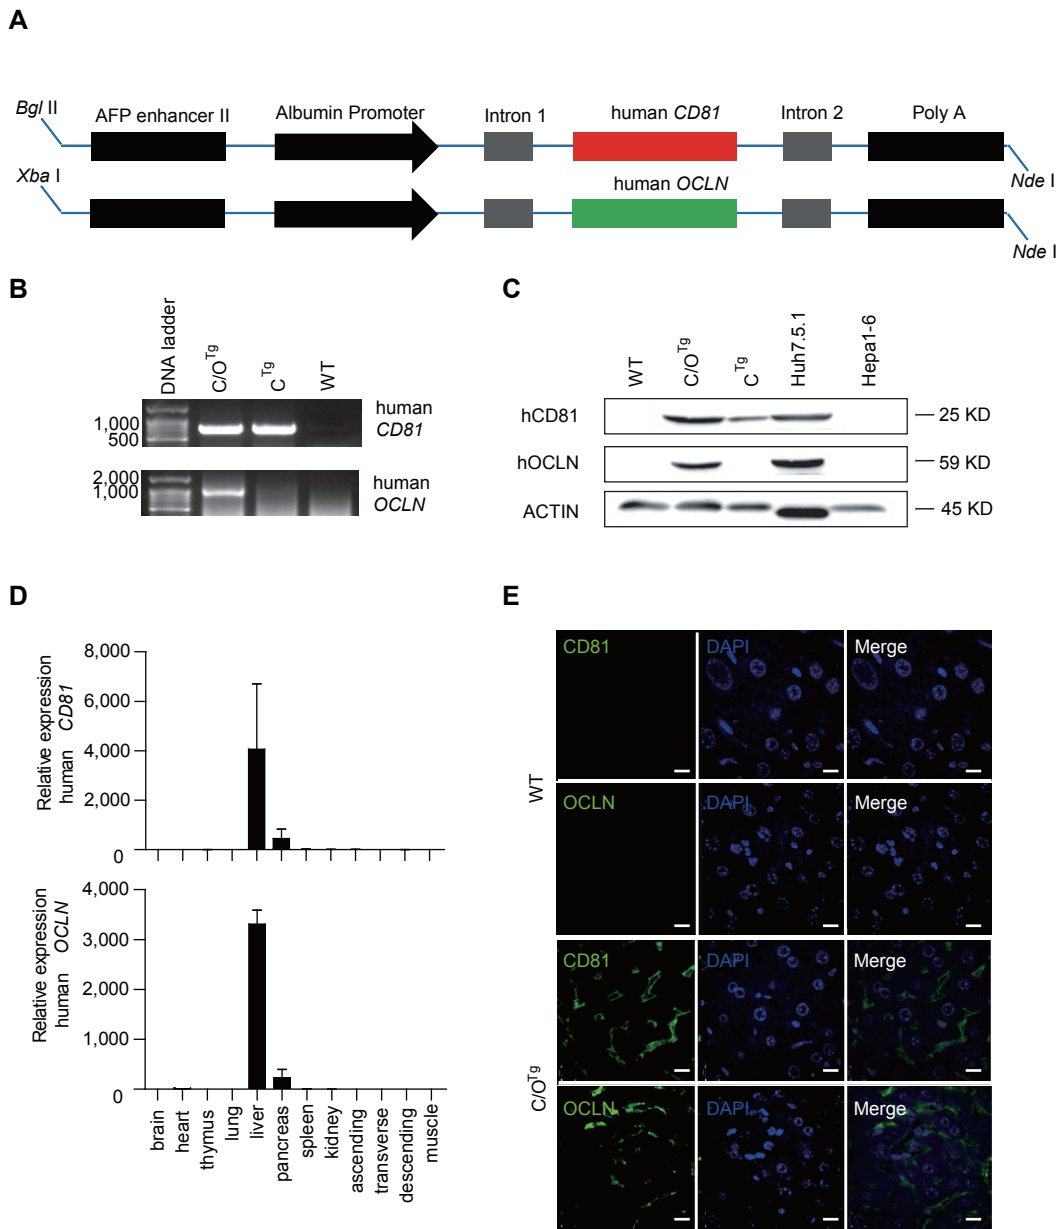

**Supplementary information, Figure S1.** Transgene constructs of  $C/O^{Tg}$  mice. (A) Human CD81 and OCLN genes were cloned in between two introns and their liver-specific expression was driven by mouse Alb promoter and AFP enhancer, respectively. Single transgenic ICR mice were generated as  $CD81^{Tg}$  ( $C^{Tg}$ ) and  $OCLN^{Tg}$  ( $O^{Tg}$ ). The heterozygous  $C^{Tg}$  and  $O^{Tg}$  littermates were crossed to yield double transgenic mice ( $CD81^{Tg}/OCLN^{Tg}$ ,  $C/O^{Tg}$ ). (B) Expression of hCD81 and hOCLN in  $C/O^{Tg}$  and  $C^{Tg}$  mice was validated by PCR (see Supplementary information, Table S6 for primers), wt ICR as control. (C) The expression of transgenes in liver of  $C/O^{Tg}$ ,  $C^{Tg}$  mice was verified by immunoblotting with human specific antibodies. Huh7.5.1 cell lysate as positive control. (D) Tissue-specific expression of the transgenes (hCD81 and hOCLN) was detected by quantitative RT-PCR on total RNA extracted from different tissues of ICR- $C/O^{Tg}$  mice (see Supplementary information, Table 6 for primers). (E) hCD81 and hOCLN expressed in tight junctions of parenchymal liver cells were detected by immunofluorescence microscopy of paraffin-embedded  $C/O^{Tg}$  liver sections ( $n = 3$ ). Wt ICR ( $n = 3$ ) liver sections were used as negative control. Green channel, hCD81 and hOCLN; blue channel, DAPI; Bars =  $10\mu m$ .
