# Supplementary material for: Persistent hepatitis C virus infections and hepatopathological manifestations in immune-competent humanized mice
Source: PubMed Central journal article supplement — Cell Res. 2014 Aug 26;24(9):1050–66. doi: 10.1038/cr.2014.116 (PMC4152738; doi:10.1038/cr.2014.116), 2014-08-26
Supplement: cr2014116x2.pdf [file cr2014116x2.pdf]

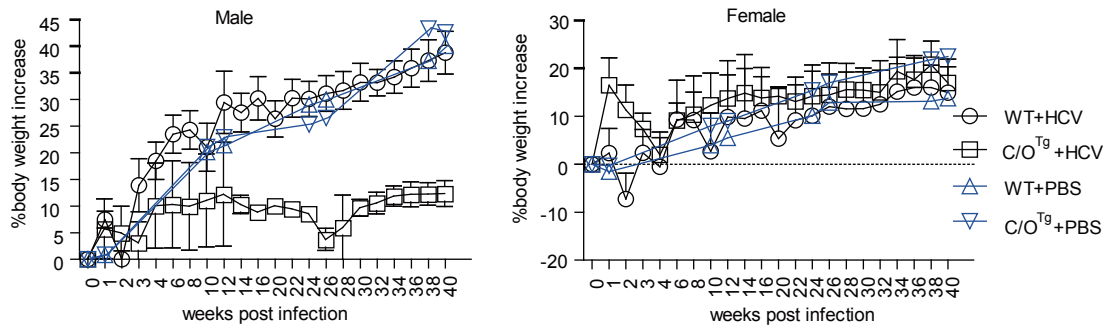

**Supplementary information, Figure S2.** Gender difference in gain of body weight after HCV J399EM infection ( $TCID_{50} = 1 \times 10^9/ml$ ). Body weights of wt ( $n = 6$  for each gender) and C/O<sup>Tg</sup> ( $n = 6$  for each gender) mice were monitored at indicated time post HCV injection. Serum HCV RNA loads were verified to ensure chronic infection in these mice (data not shown). Body weights of wt ( $n = 2$  for each gender) and C/O<sup>Tg</sup> ( $n = 2$  for each gender) mice post PBS injection were monitored as the control. Results were mean  $\pm$  SD.
