# Supplementary material for: Persistent hepatitis C virus infections and hepatopathological manifestations in immune-competent humanized mice
Source: PubMed Central journal article supplement — Cell Res. 2014 Aug 26;24(9):1050–66. doi: 10.1038/cr.2014.116 (PMC4152738; doi:10.1038/cr.2014.116), 2014-08-26
Supplement: cr2014116x3.pdf [file cr2014116x3.pdf]

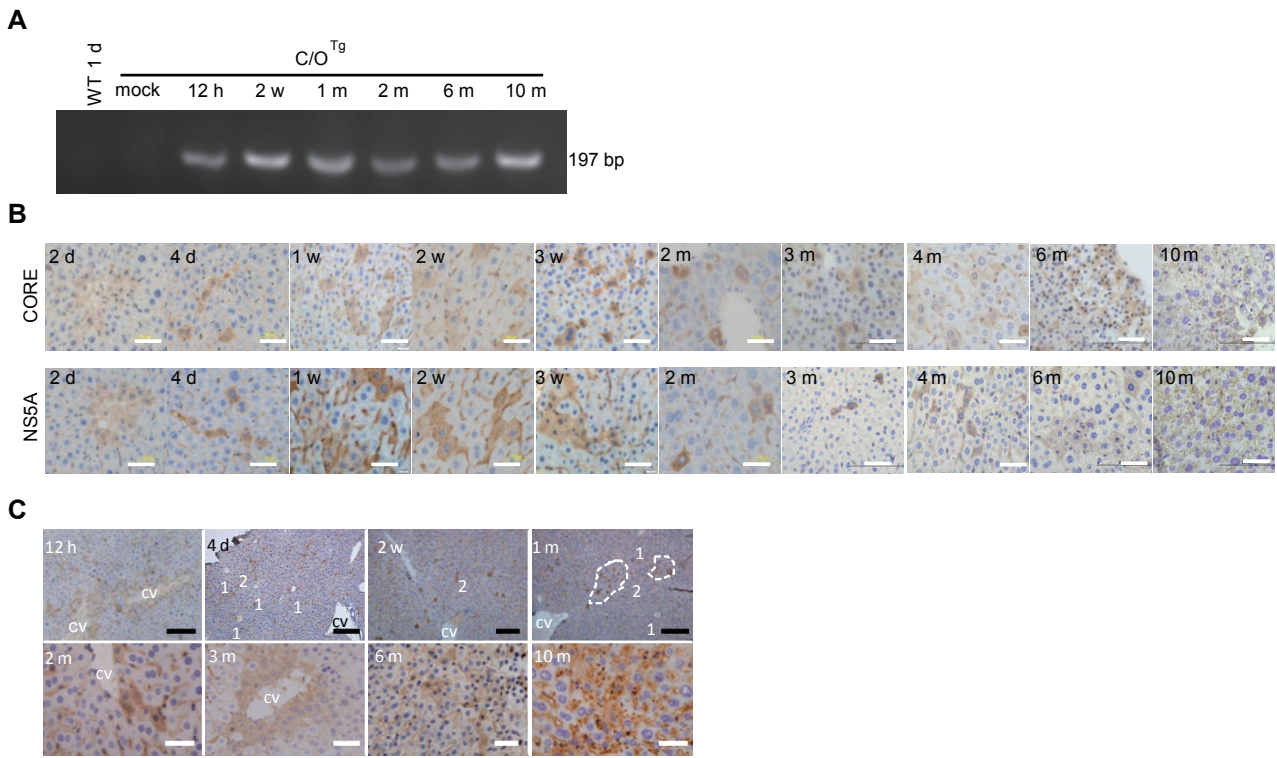

**Supplementary information, Figure S3.** (A) Negative strand HCV RNA after ICR- $C/O^{Tg}$  mice ( $n = 3$ ) infected with HCV for indicated time was detected by nested PCR. Saline mock infected  $C/O^{Tg}$  ( $n = 3$ ) and HCV inoculated wt mice ( $n = 2$ ) mice (1 d) were analyzed as controls. (B) Representative IHC sections of infected  $C/O^{Tg}$  mice ( $n = 2$  for each time point) from Figure 2D. Bar =  $100\mu\text{m}$ . (C) Representative IHC showed the spread of Core protein (3 sections per ICR- $C/O^{Tg}$  mice, 2 sections each time point from Figure 2D), indicative of HCV infection from central vein (12 hpi), and gradually to hepatic lobules (4 dpi and then after). In the beginning, Core protein dispersed in single hepatocytes (4 dpi and 2 wpi), which became clustered (1 mpi) in hepatic lobes (dashed circles). After 2 mpi, HCV Core spread to the peri-central vein in lobules. cv, central vein; 1, lobular central venous; 2, hepatic lobule. Black bar =  $100\mu\text{m}$ , white bar =  $200\mu\text{m}$ .
