# Supplementary material for: Persistent hepatitis C virus infections and hepatopathological manifestations in immune-competent humanized mice
Source: PubMed Central journal article supplement — Cell Res. 2014 Aug 26;24(9):1050–66. doi: 10.1038/cr.2014.116 (PMC4152738; doi:10.1038/cr.2014.116), 2014-08-26
Supplement: cr2014116x4.pdf [file cr2014116x4.pdf]

**A**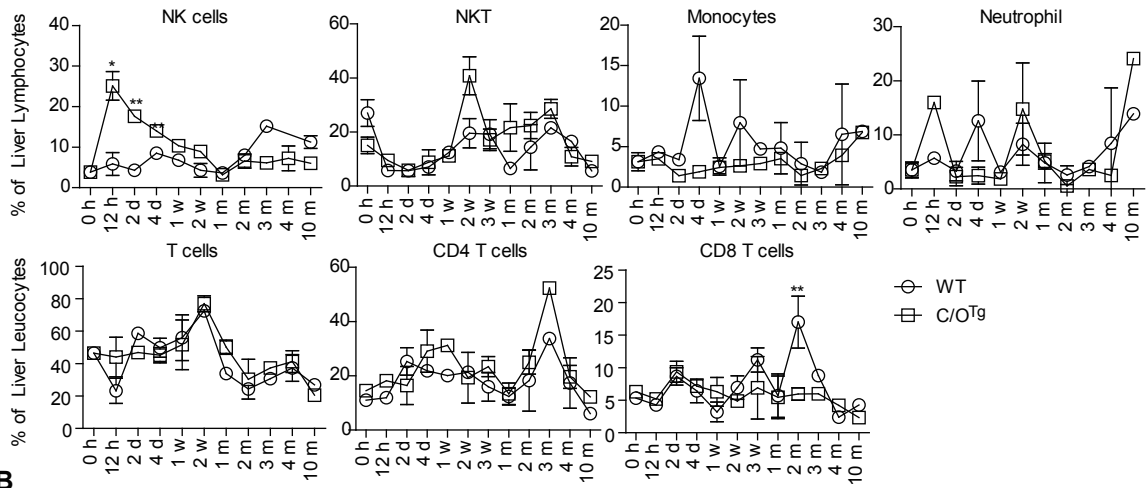**B**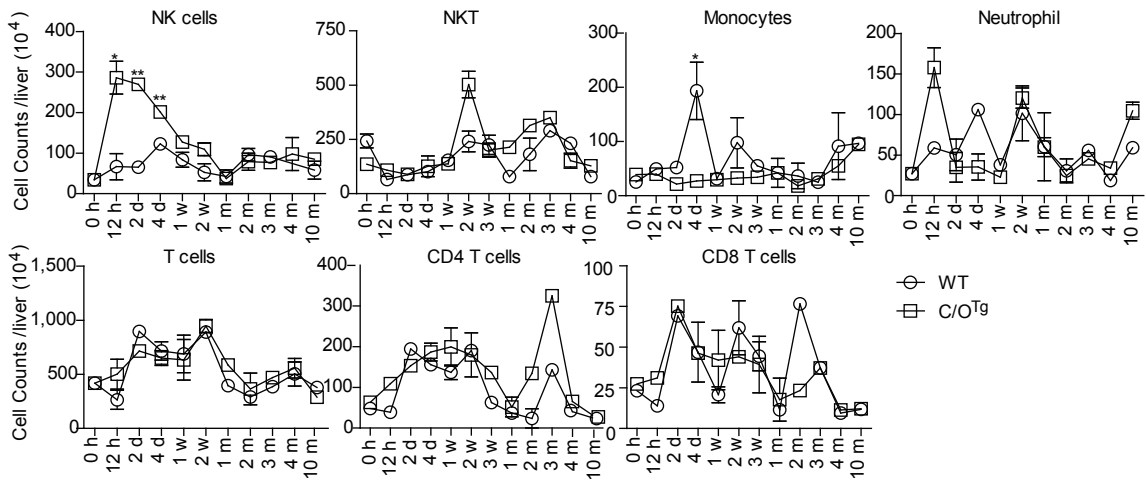

**Supplementary information, Figure S4.** Lymphocyte infiltration in C/O<sup>Tg</sup> liver after HCV J339EM (TCID<sub>50</sub> = 1×10<sup>9</sup>/ml) infection. Intrahepatic lymphocytes were prepared for FACS analyses. Frequencies (A) and absolute numbers (B) of NK (NK1.1+), NKT (NK1.1+CD3+), monocytes (CD11b+Ly6c+Ly6G-), neutrophil (CD11b+Ly6c+Ly6G+), T cell (CD3+), CD4+ T (CD3+CD4+) and CD8+ T (CD3+CD8+) cells were plotted. Data were average of 3 independent experiments and were mean±SD, ANOVA test, \* P<0.05; \*\* P<0.01.
