# Supplementary material for: Persistent hepatitis C virus infections and hepatopathological manifestations in immune-competent humanized mice
Source: PubMed Central journal article supplement — Cell Res. 2014 Aug 26;24(9):1050–66. doi: 10.1038/cr.2014.116 (PMC4152738; doi:10.1038/cr.2014.116), 2014-08-26
Supplement: cr2014116x5.pdf [file cr2014116x5.pdf]

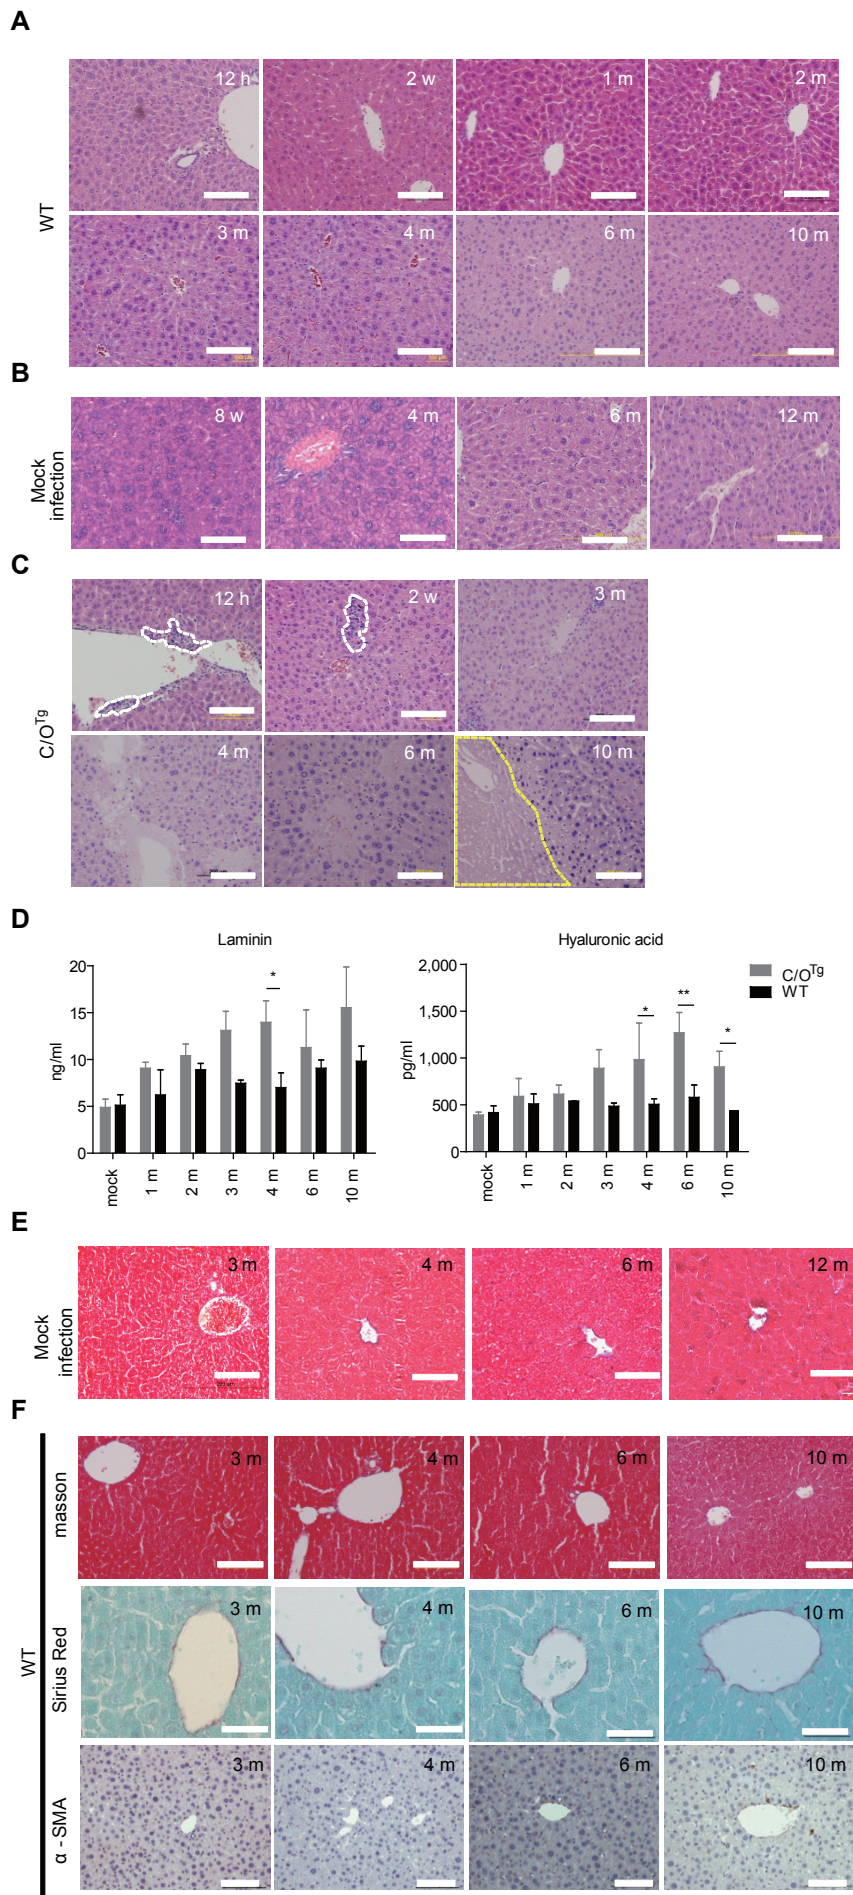

**Supplementary information, Figure S5.** Representative H&E of liver sections from (A) abortive infection of wt mice ( $n = 3$ ), (B) PBS mock infection of ICR-C/O<sup>tg</sup> mice ( $n = 4$ ), and (C) HCV J399EM infection of ICR-C/O<sup>tg</sup> mice ( $n = 3$ ) at indicated time. Dash lines in white indicated infiltrated lymphocytes (12 hpi) and aggregates (2 wpi), and dash lines in yellow represented hepatic necrosis. Bars = 100  $\mu$ m. (D) Serum levels of laminin and hyaluronic acid in wt ( $n = 14$ ) and ICR-C/O<sup>tg</sup> ( $n = 22$ ) mice after mock or HCV J399EM infection for indicated time. All data shown are mean  $\pm$  SD of three independent experiments. ANOVA test, \*  $P < 0.05$ ; \*\*  $P < 0.01$ . Representative Masson trichrome stainings of liver sections from (E) PBS mock infection of ICR-C/O<sup>tg</sup> mice ( $n = 2, 3$  mpi;  $n = 2, 3, 4$  mpi;  $n = 4, 4, 12$  mpi), and (F, top panel) HCV infected wt mice ( $n = 2, 3$  mpi;  $n = 3, 4$  mpi;  $n = 4, 6$  mpi;  $n = 4, 10$  mpi). Sirius red (middle panel) and IHC of  $\alpha$ -SMA (bottom panel) on HCV infected wt livers shown in parallel. Bars = 100  $\mu$ m for Masson trichrome and  $\alpha$ -SMA staining. Bars = 50  $\mu$ m for Sirius red staining.
