# Supplementary material for: Persistent hepatitis C virus infections and hepatopathological manifestations in immune-competent humanized mice
Source: PubMed Central journal article supplement — Cell Res. 2014 Aug 26;24(9):1050–66. doi: 10.1038/cr.2014.116 (PMC4152738; doi:10.1038/cr.2014.116), 2014-08-26
Supplement: cr2014116x7.pdf [file cr2014116x7.pdf]

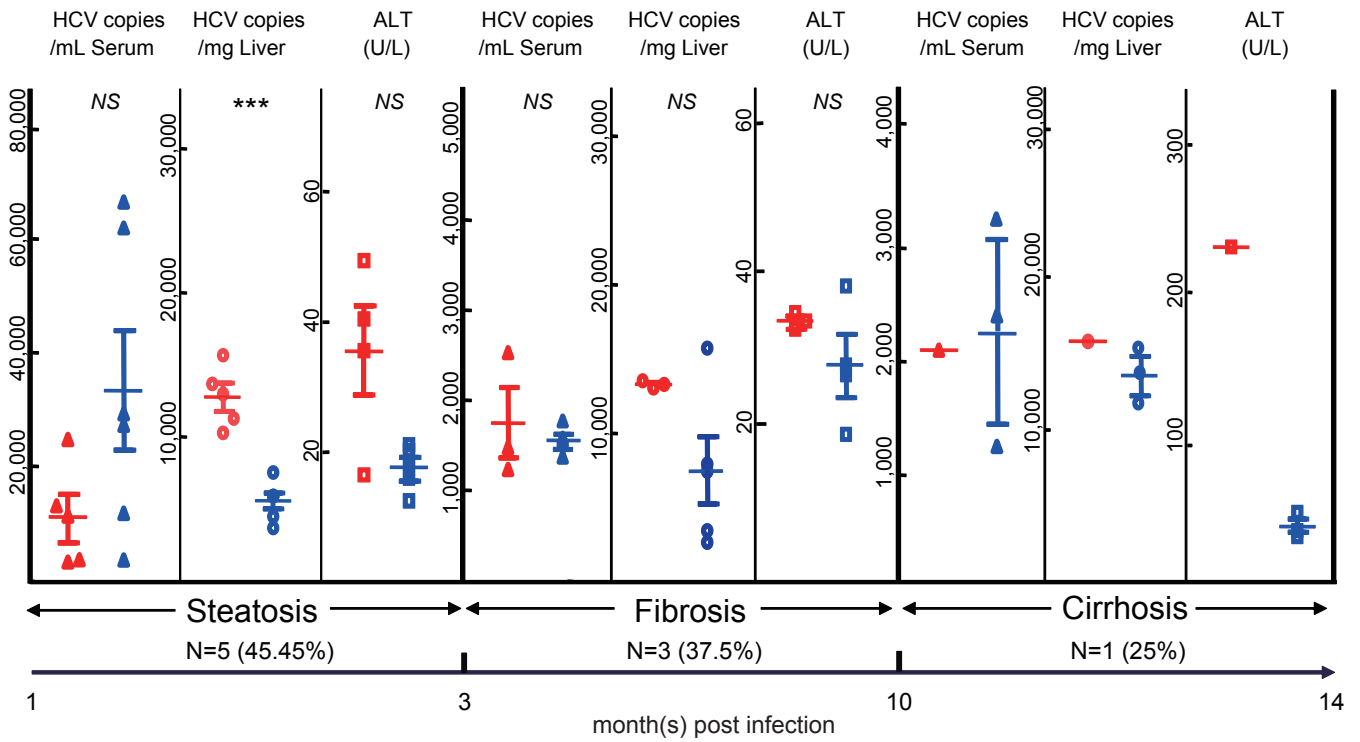

**Supplementary information, Figure S7.** Persistently infected C/O<sup>Tg</sup> mice at steatotic (11 mice within 1-3 *mpi*), fibrotic (8 mice within 3-10 *mpi*) and cirrhotic (4 mice within 10-14 *mpi*) stages of infection were randomly selected to compare the viral loads in serum and liver, and ALT levels. Mice diagnosed positive for the pathological alterations in each stage, by independent histochemical scoring, ultrasonography or CT analysis, were indicated in red dots (n = 5 showing with steatosis; n = 3 with fibrosis; n = 1 with cirrhosis), negative shown in blue dots (n = 6, 5 and 3, respectively).
