# Supplementary material for: Persistent hepatitis C virus infections and hepatopathological manifestations in immune-competent humanized mice
Source: PubMed Central journal article supplement — Cell Res. 2014 Aug 26;24(9):1050–66. doi: 10.1038/cr.2014.116 (PMC4152738; doi:10.1038/cr.2014.116), 2014-08-26
Supplement: cr2014116x8.pdf [file cr2014116x8.pdf]

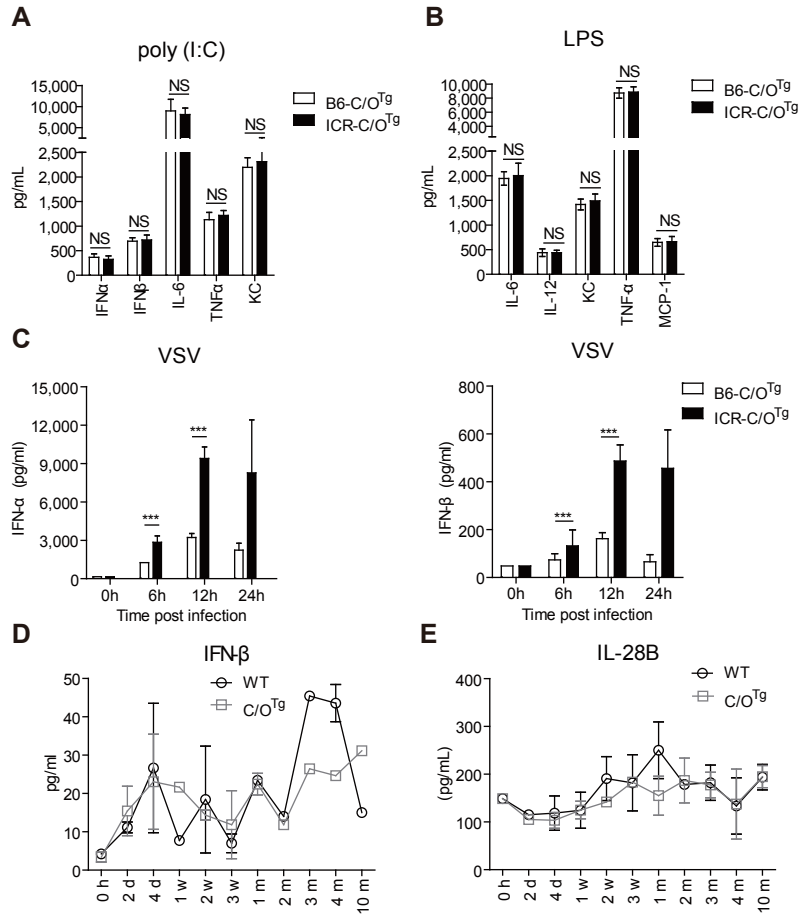

**Supplementary information, Figure S8.** Intact innate immune response of ICR C/O<sup>Tg</sup> mice. Peritoneal macrophages ( $2 \times 10^6$  cells/ml) isolated from B6- or ICR-C/O<sup>Tg</sup> mice were stimulated with 100 mg/mL poly:I:C (A) or 200 ng/mL LPS (B) for 16h. Type I IFN and cytokines in supernatants were measured. (C) B6-C/O<sup>Tg</sup> and ICR-C/O<sup>Tg</sup> mice ( $n = 3$  for each group) were i.p infected with VSV ( $200\mu\text{L}$ ,  $8 \times 10^9$  pfu/mL) for indicated time before serum IFN- $\alpha$  and IFN- $\beta$  were measured. (D-E) Serum levels of type I (IFN- $\beta$ ) and III (IL-28b) IFN in C/O<sup>Tg</sup> ( $n = 4$  each time point) and wt ( $n = 3$  each time point) mice after HCV J399EM infection ( $\text{TCID}_{50} = 1 \times 10^6/\text{mL}$ ) were measured. Data were average of three independent experiments (mean  $\pm$  SD). ANOVA test, NS, no significance, \*\*\* $P < 0.001$ .
