# Supplementary material for: Persistent hepatitis C virus infections and hepatopathological manifestations in immune-competent humanized mice
Source: PubMed Central journal article supplement — Cell Res. 2014 Aug 26;24(9):1050–66. doi: 10.1038/cr.2014.116 (PMC4152738; doi:10.1038/cr.2014.116), 2014-08-26
Supplement: cr2014116x9.pdf [file cr2014116x9.pdf]

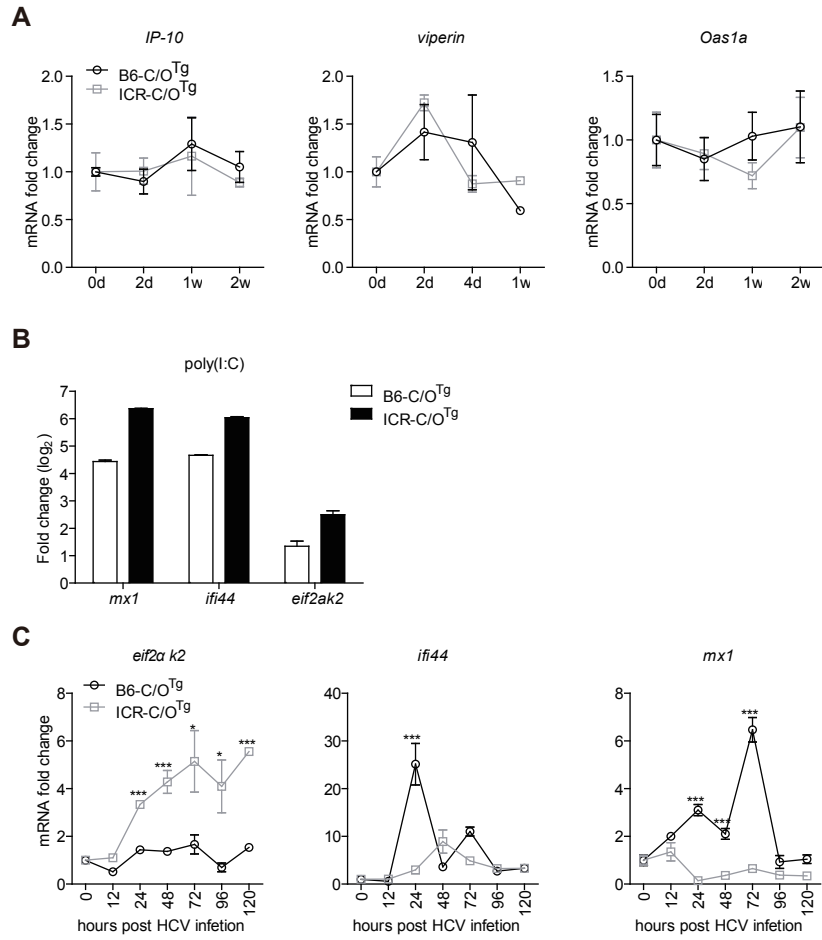

**Supplementary information, Figure S9.** (A) Induction of hepatic IP-10, Viperin and Oas1a mRNA from mice in Figure 5A. Three mice were used for infection with 1mL HCV J399EM (TCID<sub>50</sub> = 1x10<sup>9</sup>/mL) at each time point. (B) Peritoneal macrophages (2 × 10<sup>6</sup> cells/ml) isolated from B6- or ICR-C/O<sup>Tg</sup> mice were stimulated with 100 mg/mL poly(I:C) for 16h. The mRNA level of *eif2ak2*, *ifi44* and *mx1* were measured. (C) Indicated ISG mRNA levels in primary B6-C/O<sup>Tg</sup> (n = 1) or ICR-C/O<sup>Tg</sup> (n = 3) hepatocytes (1 × 10<sup>6</sup>) after infected with J399EM (MOI = 1). Data were mean ± SD, ANOVA test. \* P<0.05; \*\*\* P<0.001.
