# Supplementary material for: Persistent hepatitis C virus infections and hepatopathological manifestations in immune-competent humanized mice
Source: PubMed Central journal article supplement — Cell Res. 2014 Aug 26;24(9):1050–66. doi: 10.1038/cr.2014.116 (PMC4152738; doi:10.1038/cr.2014.116), 2014-08-26
Supplement: cr2014116x10.pdf [file cr2014116x10.pdf]

**Supplementary Table. 1. Baselines of serum chemistry profiles, cytokines and chemokines in C/O<sup>Tg</sup> mice.**

| Cytokines and chemokines (pg/mL) |      |              |              |              |              |              |       |          |       |        |       |
|----------------------------------|------|--------------|--------------|--------------|--------------|--------------|-------|----------|-------|--------|-------|
| mouse ID                         | Age  | IL-1a        | IL-1b        | IL-2         | IL-3         | IP-10        | IL-4  | IL-5     | IL-6  | IL-10  | MCP-1 |
| 120                              | 12 m | #            | 4.3          | #            | #            | 91.5         | #     | 3.4      | #     | #      | 4.2   |
| 122                              | 10 m | #            | 5.8          | #            | #            | 72.8         | #     | 1.5      | #     | #      | 2.5   |
| 152                              | 6 m  | #            | 5.8          | #            | #            | 91.5         | #     | 3.4      | #     | #      | 3.1   |
| 153                              | 6 m  | #            | 1.4          | #            | #            | 72.8         | #     | 5.2      | #     | #      | 4.7   |
| 193                              | 2 m  | #            | 5.8          | #            | #            | 91.5         | #     | 2.4      | #     | #      | 1.9   |
| 197                              | 2 m  | #            | 2.8          | #            | #            | 72.8         | #     | 4.3      | #     | #      | 2.4   |
| wt                               |      | 284.8        | 7.8          | 10.2         | #            | 116.7        | #     | #        | 18.1  | 10.4   | 3.2   |
| Cytokines and chemokines (pg/mL) |      |              |              |              |              |              |       |          |       |        |       |
|                                  | Age  | IL-17F       | IL-21        | IL-12p40     | IL-12p70     | IL17A        | IL-13 | KC/CXCL1 | IFN-g | GM-CSF | TNFa  |
| 120                              | 12 m | #            | 6.8          | 50.1         | #            | 5.1          | #     | 3.3      | #     | 4      | 2.2   |
| 122                              | 10 m | #            | #            | 15.6         | #            | 6.1          | #     | 3.3      | #     | 1.9    | #     |
| 152                              | 6 m  | #            | 0.3          | #            | #            | 6.9          | #     | #        | #     | 1.9    | 0.3   |
| 153                              | 6 m  | #            | #            | #            | #            | 5.1          | #     | #        | #     | 1.9    | #     |
| 193                              | 2 m  | #            | #            | 73.1         | #            | 6.9          | #     | 6.8      | #     | 3.4    | #     |
| 197                              | 2 m  | #            | 5.4          | 106.6        | #            | 6.1          | #     | 3.3      | #     | 3.4    | #     |
| wt                               |      | 10.2         | 7.8          | 3.2          | #            | 7.8          | 8     | 5.9      | 3.2   | 20.1   | 3.2   |
| Type I interferon (pg/mL)        |      |              |              |              |              |              |       |          |       |        |       |
| mouse ID                         | Age  | IFN-a        | IFN-b        |              |              |              |       |          |       |        |       |
| 120                              | 12 m | #            | #            |              |              |              |       |          |       |        |       |
| 122                              | 10 m | #            | 21.9         |              |              |              |       |          |       |        |       |
| 152                              | 6 m  | #            | #            |              |              |              |       |          |       |        |       |
| 153                              | 6 m  | #            | #            |              |              |              |       |          |       |        |       |
| 193                              | 2 m  | #            | #            |              |              |              |       |          |       |        |       |
| 197                              | 2 m  | #            | 24.6         |              |              |              |       |          |       |        |       |
| wt                               |      | #            | 6.8          |              |              |              |       |          |       |        |       |
| Serum chemistry profiles         |      |              |              |              |              |              |       |          |       |        |       |
| mouse ID                         | Age  | ALT<br>(U/L) | ALP<br>(U/L) | Alb<br>(g/L) | AST<br>(U/L) | PA<br>(mg/L) |       |          |       |        |       |
| 120                              | 12 m | 18           | 63           | 41           | 12           | 40           |       |          |       |        |       |
| 122                              | 10 m | 35           | 73           | 44           | 27           | 33           |       |          |       |        |       |
| 152                              | 6 m  | 36           | 65           | 46           | 26           | 40           |       |          |       |        |       |
| 153                              | 6 m  | 36           | 64           | 47           | 24           | 38           |       |          |       |        |       |
| 193                              | 2 m  | 23           | 67.5         | 47           | 19           | 30           |       |          |       |        |       |
| 197                              | 2 m  | 24           | 66           | 42           | 30           | 28           |       |          |       |        |       |

# below detection limit of the kit. The detection limit for each parameter is: IL-1a (10.3 pg/mL), IL-1b (5.4 pg/mL), IL-2 (1 pg/mL), IL-3 (1 pg/mL), IP-10 (0.8 pg/mL), IL-4 (0.4 pg/mL), IL-5 (1 pg/mL), IL-6 (1.1 pg/mL), IL-10 (2 pg/mL), MCP-1 (6.7 pg/mL), IL-17F (10 pg/mL), IL-21 (20 pg/mL), IL-12p40 (3.9 pg/mL), IL-12p70 (4.8 pg/mL), IL-17A (39 pg/mL), IL-13 (8.3 pg/mL), KC (2.3 pg/mL), IFN-g (1.1 pg/mL), GM-CSF (10.9 pg/mL), TNF-a (2.3 pg/mL), IFN-a (22 pg/mL), IFN-b (34.5 pg/mL), ALT (10 U/L), ALP (1 U/L), Alb (10 U/L), AST (10 U/L), PA(20 mg/L).
