# Supplementary material for: Persistent hepatitis C virus infections and hepatopathological manifestations in immune-competent humanized mice
Source: PubMed Central journal article supplement — Cell Res. 2014 Aug 26;24(9):1050–66. doi: 10.1038/cr.2014.116 (PMC4152738; doi:10.1038/cr.2014.116), 2014-08-26
Supplement: cr2014116x11.pdf [file cr2014116x11.pdf]

**Supplementary Table. 2. Health conditions of chronic hepatitis C mice**

|                           | <b>WT (n=44)</b> | <b>C/O<sup>Tg</sup> (n=67)</b> |
|---------------------------|------------------|--------------------------------|
| Hair                      | normal           | normal                         |
| Necrotizing fasciitis     | 2 (after 4 m)    | 2 (after 6 m)                  |
| Spiraling                 | N/A              | 3 (after 5 m)                  |
| Body weight <sup>\$</sup> | Normal           | Reduced in male                |
| Food intake*              | 0.82 (0.6-1.4)   | 0.46 (0.3-0.7)                 |

<sup>\$</sup> see supplementary figure 2 for statistics.

\* Represented as grams of food consumed in 1 h after fasting for 16 h, no significant difference was observed between male and female mice.
