# Supplementary material for: Persistent hepatitis C virus infections and hepatopathological manifestations in immune-competent humanized mice
Source: PubMed Central journal article supplement — Cell Res. 2014 Aug 26;24(9):1050–66. doi: 10.1038/cr.2014.116 (PMC4152738; doi:10.1038/cr.2014.116), 2014-08-26
Supplement: cr2014116x12.pdf [file cr2014116x12.pdf]

**Supplementary Table. 3. Mice allocation in HCV infection cohort<sup>S</sup>**

|                          | cohort                | notes                 | 12 h | 2 d  | 4 d  | 1 w  | 2 w  | 3 w  | 1 m  | 2 m | 3 m | 4 m | 6 m | 10 m | 12 m | E                  | P | N  |
|--------------------------|-----------------------|-----------------------|------|------|------|------|------|------|------|-----|-----|-----|-----|------|------|--------------------|---|----|
| Batch 1                  | ICR-C/O <sup>Tg</sup> |                       | 2    | 2    | 3    | 2    | 4    | 2    | 4    | 3   | 3   | 1   | 1   | 1    | 1    | 2*, 6 <sup>#</sup> | 2 | 33 |
|                          | WT                    |                       | 2    | 2    | 2    | 2    | 2    | 2    | 1    | 1   | 1   | 1   | 1   | 1    | 2    |                    |   |    |
| Batch 2                  | ICR-C/O <sup>Tg</sup> | J399EM                |      | 2    | 2    | 3    | 4    | 3    | 4    | 2   | 1   | 2   | 1   | 1    | 1    | 1*, 5 <sup>#</sup> | 3 | 30 |
|                          | WT                    |                       |      | 1    | 1    | 1    | 1    | 1    | 1    | 1   | 1   | 1   | 1   | 1    | 1    |                    |   |    |
| Batch 3                  | ICR-C/O <sup>Tg</sup> |                       |      | 2    | 2    | 2    | 2    | 2    | 3    | 1   | 1   | 2   | 1   | 1    | 1    | 3 <sup>#</sup>     | 1 | 21 |
|                          | WT                    |                       |      | 1    | 1    | 1    | 1    | 1    | 1    | 1   | 1   | 1   | 1   | 1    | 1    |                    |   |    |
|                          |                       |                       |      | 1 w  | 2 w  |      |      |      |      |     |     |     |     |      |      |                    |   |    |
| Batch 4                  | ICR-C/O <sup>Tg</sup> | Human serum(1b)       |      | 3    | 3    |      |      |      |      |     |     |     |     |      |      |                    |   | 6  |
|                          | ICR-C/O <sup>Tg</sup> | Human serum(2a)       |      | 3    | 3    |      |      |      |      |     |     |     |     |      |      |                    |   | 6  |
|                          | ICR-C/O <sup>Tg</sup> | con1/JFH1             |      | 3    | 3    |      |      |      |      |     |     |     |     |      |      |                    |   | 6  |
| Batch 5                  | ICR-C/O <sup>Tg</sup> | Gradient dose(J399EM) |      |      | 9    |      |      |      |      |     |     |     |     |      |      |                    |   | 9  |
|                          |                       |                       |      | 1 w  | 2 w  | 3 w  |      |      |      |     |     |     |     |      |      |                    |   |    |
| Batch 6 <sup>&amp;</sup> | ICR-C/O <sup>Tg</sup> | DMSO(J399EM)          |      | 3    | 3    | 3    |      |      |      |     |     |     |     |      |      |                    |   |    |
|                          | ICR-C/O <sup>Tg</sup> | VX-950(J399EM)        |      | 3    | 3    | 3    |      |      |      |     |     |     |     |      |      |                    |   |    |
|                          |                       |                       |      | 2 d  | 1 w  | 2 w  |      |      |      |     |     |     |     |      |      |                    |   |    |
| Batch 7                  | B6-C/O <sup>Tg</sup>  | J399EM                |      | 3    | 3    | 3    |      |      |      |     |     |     |     |      |      |                    |   |    |
|                          | ICR-C/O <sup>Tg</sup> |                       |      | 3    | 3    | 3    |      |      |      |     |     |     |     |      |      |                    |   |    |
|                          |                       |                       |      | 6 h  | 12 h | 24 h | 48 h | 96 h | 1 w  | 2 w | 3 w | 1 m |     |      |      |                    |   |    |
| Batch 8                  | ICR-C <sup>Tg</sup>   | J399EM                |      | 3    | 3    | 3    | 3    | 3    | 3    | 3   | 3   | 3   |     |      |      |                    |   |    |
|                          | ICR-C/O <sup>Tg</sup> |                       |      | 3    | 3    | 3    | 3    | 3    | 3    | 3   | 3   | 3   | 3   |      |      |                    |   |    |
|                          |                       |                       |      | 12 h | 2 w  | 1 m  | 2 m  | 6 m  | 10 m |     |     |     |     |      |      |                    |   |    |
| Batch 9                  | ICR-C/O <sup>Tg</sup> | JFH1                  |      | 1    | 1    | 1    | 1    | 1    | 1    |     |     |     |     |      |      |                    |   |    |

P: prolonged observation; E: number of excluded mice; N: number of mice in the batch.

\* death due to fulminant hepatitis or unknown reasons;

<sup>#</sup> negative for viral load in liver at the time of assay.

<sup>&</sup> VX-950 treatment started from 1w post HCV infection.

<sup>S</sup> Mice were sacrificed at the indicated time for liver or spleen biopsy, and blood was collected (~0.4 mL sera) for viral load analysis. Before termination, each mouse was bled (~50uL) at each prior time point for analysis of serology, serum chemistry or inflammatory cytokines profiling.
