# Supplementary material for: Persistent hepatitis C virus infections and hepatopathological manifestations in immune-competent humanized mice
Source: PubMed Central journal article supplement — Cell Res. 2014 Aug 26;24(9):1050–66. doi: 10.1038/cr.2014.116 (PMC4152738; doi:10.1038/cr.2014.116), 2014-08-26
Supplement: cr2014116x13.pdf [file cr2014116x13.pdf]

**Supplementary Table. 4. HCV genome copies of the cohorts in Fig. 1A-B**

|      | copies/ml (serum) |          |          |          |          |          |        |        | C/O <sup>Tg</sup> |        |      |       |  |
|------|-------------------|----------|----------|----------|----------|----------|--------|--------|-------------------|--------|------|-------|--|
|      | WT                |          |          |          |          |          |        |        |                   |        |      |       |  |
| 12 h | 54275800          | 53218000 |          |          | 38119660 | 33853910 |        |        |                   |        |      |       |  |
| 2 d  | 19820120          | 17278280 | 35296600 | 30769970 | 3416044  | 1703968  | 564260 | 747228 | I/S               | I/S    |      |       |  |
| 4 d  | 7196              | 10703    | 6227     | 3978     | 282918   | 451640   | 101385 | 79825  | I/S               | I/S    |      |       |  |
| 1 w  | 0                 | 1523     | 0        | 0        | 127563   | 119415   | 7857   | 3184   | I/S               | I/S    |      |       |  |
| 2 w  | 0                 | 0        | 0        | 0        | 61963    | 66510    | 69054  | 72961  | I/S               | I/S    | I/S  | I/S   |  |
| 3 w  | 0                 | 0        | 0        | 0        | 53503    | 29227    | 24753  | 27200  |                   |        |      |       |  |
| 1 m  | 0                 | 0        | 0        |          | 11715    | 9328     | 3507   | 3135   | I/S               | I/S    | I/S  | I/S   |  |
| 2 m  | 0                 | 0        | 0        |          | 13046    | 7857     | 3184   | 2870   |                   |        |      |       |  |
| 3 m  | 0                 | 0        | 0        |          | 544      | 571      | 657    | I/S    |                   |        |      |       |  |
| 4 m  | 0                 | 0        | 0        |          | 652      | 571      | 679    | I/S    |                   |        |      |       |  |
| 6 m  | 0                 | 0        | 0        |          | 1235     | 1516     | 1896   |        |                   |        |      |       |  |
| 10 m | 0                 | 0        | 0        |          | 1476     | 1581     | 6949   |        |                   |        |      |       |  |
| 12 m | 0                 | 0        | 0        | 0        | 2311     | 1765     | 2127   |        |                   |        |      |       |  |
|      | copies/ mg(liver) |          |          |          |          |          |        |        | C/O <sup>Tg</sup> |        |      |       |  |
|      | WT                |          |          |          |          |          |        |        |                   |        |      |       |  |
| 12 h | 0                 | 0        |          |          | 130993   | 168360   |        |        |                   |        |      |       |  |
| 2 d  | 0                 | 0        | 0        | 0        | 88184    | 97621    | 35815  | 39313  | 64839             | 87407  |      |       |  |
| 4 d  | 0                 | 0        | 0        | 0        | 25383    | 30094    | 50983  | 41906  | 18006             | 14632  |      |       |  |
| 1 w  | 0                 | 0        | 0        | 0        | 19916    | 14149    | 19530  | 13083  | 121447            | 100979 |      |       |  |
| 2 w  | 0                 | 0        | 0        | 0        | 6044     | 4309     | 6045   | 4760   | 5753              | 4434   | 4516 | 5912  |  |
| 3 w  | 0                 | 0        | 0        | 0        | 4333     | 4333     | 4685   | 5542   |                   |        |      |       |  |
| 1 m  | 0                 | 0        | 0        |          | 4501     | 4748     | 5910   | 3692   | 3704              | 2116   | 7544 | 12981 |  |
| 2 m  | 0                 | 0        | 0        |          | 1284     | 5911     | 1284   | 5911   |                   |        |      |       |  |
| 3 m  | 0                 | 0        | 0        |          | 1856     | 1807     | 2267   | 3798   |                   |        |      |       |  |
| 4 m  | 0                 | 0        | 0        |          | 3455     | 2656     | 5872   | 3088   |                   |        |      |       |  |
| 6 m  | 0                 | 0        | 0        |          | 13526    | 7933     | 9579   |        |                   |        |      |       |  |
| 10 m | 0                 | 0        | 0        |          | 13046    | 15737    | 12493  |        |                   |        |      |       |  |
| 12 m | 0                 | 0        | 0        | 0        | 15543    | 16558    | 14743  |        |                   |        |      |       |  |

Detection limit: 500 copies/ml for serum, 100 copies/mg for liver tissue;  
 I/S: insufficient sample; 0: below the detection limit
