# Supplementary material for: Persistent hepatitis C virus infections and hepatopathological manifestations in immune-competent humanized mice
Source: PubMed Central journal article supplement — Cell Res. 2014 Aug 26;24(9):1050–66. doi: 10.1038/cr.2014.116 (PMC4152738; doi:10.1038/cr.2014.116), 2014-08-26
Supplement: cr2014116x14.pdf [file cr2014116x14.pdf]

## Supplementary Table. 5. Patients' information

| P.N.* | Gender | Age | V.L.# | G.T.§ | HBsAg | HBsAb | HBeAg | HBeAb | HBcAb | TP | ALB | TBIL | DBIL | IBIL | CHE  | ALP | GGT | TC | TG   | GLU | ALT | AST | IFN treated          |
|-------|--------|-----|-------|-------|-------|-------|-------|-------|-------|----|-----|------|------|------|------|-----|-----|----|------|-----|-----|-----|----------------------|
| 5331  | M      | 60  | 2.59  | 2a    | n     | n     | n     | n     | p     | 79 | 47  | 23   | 6    | 17   | 7601 | 63  | 35  | 4  | 1.75 | 4.2 | 19  | 31  | 5x10 <sup>6</sup> IU |
| 900   | F      | 58  | 3.76  | 2a    | n     | p     | n     | n     | p     | 75 | 44  | 10   | 8    | 2    | 4964 | 137 | 18  | 5  | 1    | 5.5 | 21  | 60  | 5x10 <sup>6</sup> IU |
| 840   | M      | 50  | 4.12  | 1b    |       |       |       |       |       | 81 | 49  | 16   | 5    | 11   | 8721 | 96  | 26  | 4  | 1.89 | 4.7 | 21  | 20  | 5x10 <sup>6</sup> IU |
| 858   | M      | 68  | 9.96  | 1b    | n     | n     | n     | n     | p     | 90 | 46  | 21   | 13   | 8    | 7929 | 75  | 80  | 4  | 1.01 | 6.1 | 39  | 59  | 5x10 <sup>6</sup> IU |

\* P.N. Patient No;

# V.L. Viral load in serum(x10<sup>6</sup> IU/mL RNA);

§ G.T. HCV genotype;

TP, total protein. ALB, albumin. TBIL, total bilirubin. IBIL, indirect bilirubin. CHE, cholinesterase. ALP, Alkaline phosphatase.

GGT, gamma-glutamyl transpeptidase. TC, total cholesterol. TG, triglyceride. Glu, glucose. ALT, alanine aminotransferase.

AST, aspartate aminotransferase. IFN, interferon.
