# Supplementary material for: Persistent hepatitis C virus infections and hepatopathological manifestations in immune-competent humanized mice
Source: PubMed Central journal article supplement — Cell Res. 2014 Aug 26;24(9):1050–66. doi: 10.1038/cr.2014.116 (PMC4152738; doi:10.1038/cr.2014.116), 2014-08-26
Supplement: cr2014116x15.pdf [file cr2014116x15.pdf]

## Supplementary Table. 6. Primes and probes.

|                                          | strand                   | sequences                                                    |
|------------------------------------------|--------------------------|--------------------------------------------------------------|
| Cloning<br>Primers*                      | hCD81-F                  | GCGGGATCCGCCACCATGGGAGTGGAGGGCTGC                            |
|                                          | hCD81-R                  | GCGCTCGAGTCAGTACACGGAGCTGTTC                                 |
|                                          | hOCLN-F                  | GCGGTTCGACGCCACCATGTCATCCAGGCCTTTG                           |
|                                          | hOCLN-R                  | GCGCTCGAGCTATGTTTTCTGTCTATCATAG                              |
| Genotyping<br>primers                    | hCD81-F                  | GCCATGACCCGCAGACCACC                                         |
|                                          | hCD81-R                  | CCGGATGCCACAGCACAGCA                                         |
|                                          | hOCLN-F                  | TGTGTGGCCTCCACGCTTGC                                         |
|                                          | hOCLN-R                  | GGACTCGCCGCCAGTTGTGT                                         |
| miR-122                                  | RT                       | GTCGTATCCAGTGCAGGGTCCGAGGTATTCGCACTGGATACGACCAAACA           |
| HCV negative<br>strand primers           | RT                       | TGTCATGGTGGCGAATAAGCCATGGCGTTAGTAT                           |
|                                          | 1-F                      | TGTCATGGTGGCGAATAA                                           |
|                                          | 1-R                      | GGGACCGCTCCGAAGTTTT                                          |
|                                          | 2-F                      | GCCGAGTAGCGTTGGGTT                                           |
|                                          | 2-R                      | ACAAGTATACTCCGCCAACG                                         |
| Molecular<br>beacon probes               | POSITIVE                 | TRAMRA-CCGGTGAagagccatagtggtctgcgaaTCACCGG-DABCYL            |
|                                          | NEGATIVE                 | TRMRA-CCGGTGA <sup>†</sup> tcgagaccactatggctctTCACCGG-DABCYL |
| Real-time<br>PCR<br>primers <sup>†</sup> | hCD81_F                  | AACATCATCAGCAACCT <u>CTTCA</u>                               |
|                                          | hCD81_R                  | CAATGCCGATGAGGTACAG                                          |
|                                          | hOCLN_F                  | ATATGGTTCACAAATATAT <u>GCCC</u>                              |
|                                          | hOCLN_R                  | CCCCAGTACAATGGCAATG                                          |
|                                          | HCV(5'UTR)_F             | ATCACTCCCCTGTGAGGAAT                                         |
|                                          | HCV(5'UTR)_R             | GCGGGTTGATCCAAGAAAGG                                         |
|                                          | HCV(1b)_F                | CGGGAGAGCCATAGTGGTCTGCG                                      |
|                                          | HCV(1b)_R                | CTCGCAAGCACCTATCAGGCAGTA                                     |
|                                          | HCV(2a)_F                | GTCTAGCCATGGCGTTAGTATGAG                                     |
|                                          | HCV(2a)_R                | ACCCTATCAGGCAGTACCACAAG                                      |
|                                          | ACTIN_F                  | AAGGAGCCCACGAGAAAAAT                                         |
|                                          | ACTIN_R                  | ACCGAACTTGCATTGATTCCAG                                       |
|                                          | ApoE_F                   | CTGACAGGATGCCTAGCCG                                          |
|                                          | ApoE_R                   | CGCAGGTAATCCCAGAAGC                                          |
|                                          | miR-122_F                | GCGGCGGTGGAGTGTGACA                                          |
|                                          | miR-122_R                | ATCCAGTGCAGGGTCCGAGG                                         |
|                                          | U6 snRNA_F               | CGCTTCGGCAGCACATATAC                                         |
|                                          | U6 snRNA_R               | TTCACGAATTTGCGTGTGTCAT                                       |
|                                          | mGAPDH_F                 | ACGGCCGCATCTTCTTGTGCA                                        |
|                                          | mGAPDH_R                 | ACGGCCAATCCGTTACACC                                          |
|                                          | mViperin_F               | TGCTGGCTGAGAATAGCATTAGG                                      |
|                                          | mViperin_R               | GCTGAGTGTGTTCCCATCT                                          |
|                                          | mIif27_F                 | GCTTGTGGGAACCCTGTTTG                                         |
|                                          | mIif27_R                 | GGATGGCATTGTTGATGTGGAG                                       |
|                                          | mIif44_F                 | AACTGACTGCTCGCAATAATGT                                       |
|                                          | mIif44_R                 | GTAACACAGCAATGCCTCTTGT                                       |
|                                          | mMx1_F                   | GACCATAGGGTCTTGACCAA                                         |
|                                          | mMx1_R                   | AGACTTGCTCTTTCTGAAAAGCC                                      |
|                                          | mEif2ak2_F               | ATGCACGGAGTAGCCATTACG                                        |
|                                          | mEif2ak2_R               | TGACAAATCCACCTGTTTTCGT                                       |
|                                          | mOas1a_F                 | ATGGAGCACGGACTCAGGA                                          |
|                                          | mOas1a_R                 | TCACACACGACATTGACGGC                                         |
|                                          | mIifnb1_F                | CAGCTCCAAGAAAGGACGAAC                                        |
| mIifnb1_R                                | GGCAGTGTAACTCTTCTGCAT    |                                                              |
| mIip10_F                                 | CCAAGTGCTGCCGTCATTTTC    |                                                              |
| mIip10_R                                 | GGCTCGCAGGGATGATTTCAA    |                                                              |
| mCypA_F                                  | GACTGAATGGCTGGATGGC      |                                                              |
| mCypA_R                                  | GGTGATCTTCTGCTGGTCTTG    |                                                              |
| mIifna4_F                                | AGGACAGGAAGGATTTTGA      |                                                              |
| mIifna4_R                                | GCTGCTGATGGAGGTCATT      |                                                              |
| mIifn3_F                                 | CTCTTCATACACTGAGCCACATTC |                                                              |
| mIifn3_R                                 | AACAGGTTGGAGGTGACAGA     |                                                              |

\* the underline indicates restriction sites

<sup>†</sup> the underline indicates specific sites in human
