# Supplementary material for: Persistent hepatitis C virus infections and hepatopathological manifestations in immune-competent humanized mice
Source: PubMed Central journal article supplement — Cell Res. 2014 Aug 26;24(9):1050–66. doi: 10.1038/cr.2014.116 (PMC4152738; doi:10.1038/cr.2014.116), 2014-08-26
Supplement: cr2014116x16.pdf [file cr2014116x16.pdf]

**Supplementary Table. 7. Ultrasonography assessment of liver fibrosis**

|                        | <b>Normal</b> | <b>Fibrosis</b> |
|------------------------|---------------|-----------------|
| liver capsule          | smoothness    | ripple          |
| Echo Intensity         | regular       | thickening      |
| intensity distribution | homogeneous   | inhomogenous    |
| vessels                | clear         | unclear         |
