# Supplementary material for: Persistent hepatitis C virus infections and hepatopathological manifestations in immune-competent humanized mice
Source: PubMed Central journal article supplement — Cell Res. 2014 Aug 26;24(9):1050–66. doi: 10.1038/cr.2014.116 (PMC4152738; doi:10.1038/cr.2014.116), 2014-08-26
Supplement: cr2014116x17.pdf [file cr2014116x17.pdf]

**Supplementary Table. 8. Computed tomography assessment of liver cirrhosis**

|               | <b>Normal</b> | <b>Cirrhosis</b> |
|---------------|---------------|------------------|
| caudate lobe  | normal        | enlarged         |
| hepatic lobe  | normal        | atrophy          |
| hepatic notch | normal        | notch-sign       |
