# Supplementary material for: Persistent hepatitis C virus infections and hepatopathological manifestations in immune-competent humanized mice
Source: PubMed Central journal article supplement — Cell Res. 2014 Aug 26;24(9):1050–66. doi: 10.1038/cr.2014.116 (PMC4152738; doi:10.1038/cr.2014.116), 2014-08-26
Supplement: cr2014116x18.pdf [file cr2014116x18.pdf]

**Supplementary Table. 9. Gender-specific response to HCV J399EM infection**

| Stage                  | Male (positive/total) | Femal (positive/total) |
|------------------------|-----------------------|------------------------|
| Uninfected or abortive | 8/43                  | 6/41                   |
| fulminant hepatitis    | 2/43                  | 1/41                   |
| Chronic infected       | 33/43                 | 34/41                  |
| Steatosis              | 3/4                   | 2/7                    |
| Fibrosis               | 2/4                   | 1/4                    |
| Cirrhosis              | 0/1                   | 1/3                    |
